# Supplementary material for: Circulation of HAdV-41 with diverse genome types and recombination in acute gastroenteritis among children in Shanghai
Source: PubMed Central journal article supplement (PMC5471248; doi:10.1038/s41598-017-01293-3), 2017-06-14
Supplement: 41598_2017_1293_MOESM1_ESM.pdf [file 41598_2017_1293_MOESM1_ESM.pdf]

1 **Circulation of Human Adenovirus-41 with diverse genome types and**  
2 **recombination in acute gastroenteritis among children in Shanghai**

3 Peng Li<sup>1#</sup>, Lang Yang<sup>1#</sup>, Jiayin Guo<sup>2#</sup>, Wenwei Zou<sup>3#</sup>, Xuebin Xu<sup>4#</sup>, Xiaoxia Yang<sup>1</sup>,  
4 Xinying Du<sup>1</sup>, Shaofu Qiu<sup>1\*</sup> AND Hongbin Song<sup>1\*</sup>

5 <sup>1</sup>Institute of Disease Control and Prevention, Academy of Military Medical Sciences,  
6 Beijing, China

7 <sup>2</sup>Shanghai Changning District Center for Disease Control and Prevention, Shanghai,  
8 200051

9 <sup>3</sup>Shanghai Pudong New Area Center for Disease Control and Prevention, Shanghai,  
10 200136

11 <sup>4</sup>Shanghai Center for Disease Control and Prevention, Shanghai, China

12 #These authors contributed equally to this work.

13 \*Address correspondence to Shaofu Qiu, [qiushf0613@hotmail.com](mailto:qiushf0613@hotmail.com) or Hongbin Song,  
14 [hongbinsong@263.net](mailto:hongbinsong@263.net)

15 Institute of Disease Control and Prevention, Academy of Military Medical Sciences,  
16 20 DongDa Street, Fengtai District, Beijing 100071, China.

17 Tel: (86)-10-66948475

18 Fax: (86)-10-66948475

**Supplementary Figure S1.** The neighbor-Joining tree based on the penton gene

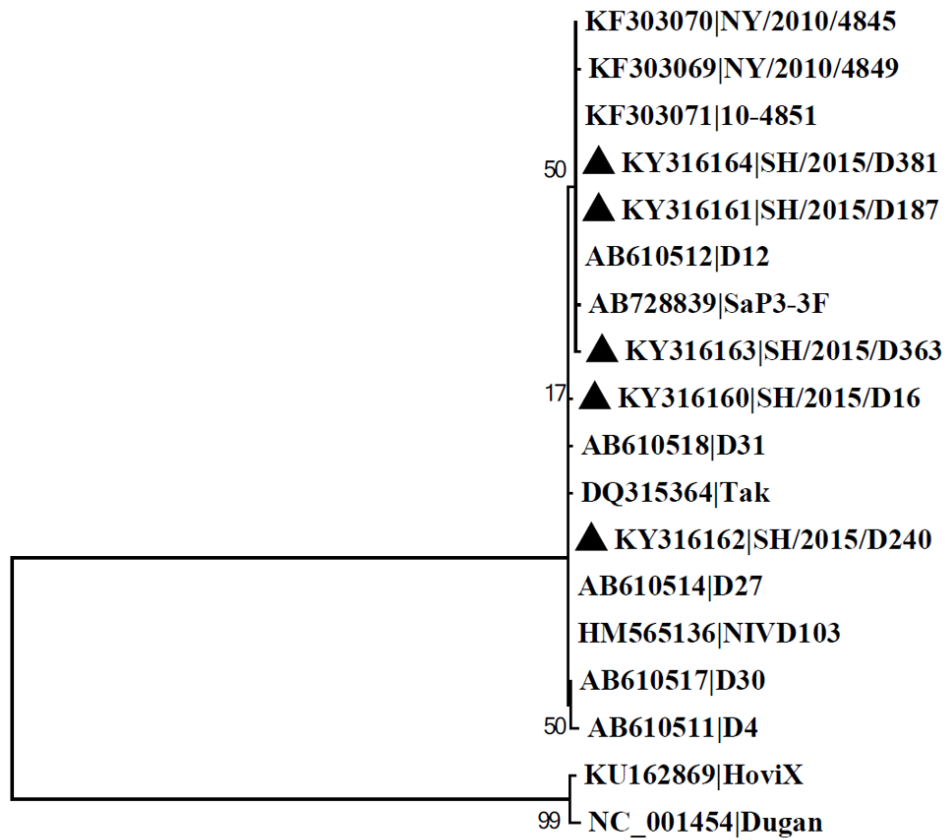

0.02

**Supplementary Figure S2.** The Maximum-Likelihood tree based on the whole genome (a), hexon (b), DNA polymerase (c), long fiber (d) and short fiber (e). The ML trees were inferred based on the General Time Reversible model with 1000 bootstrap values using MEGA6.

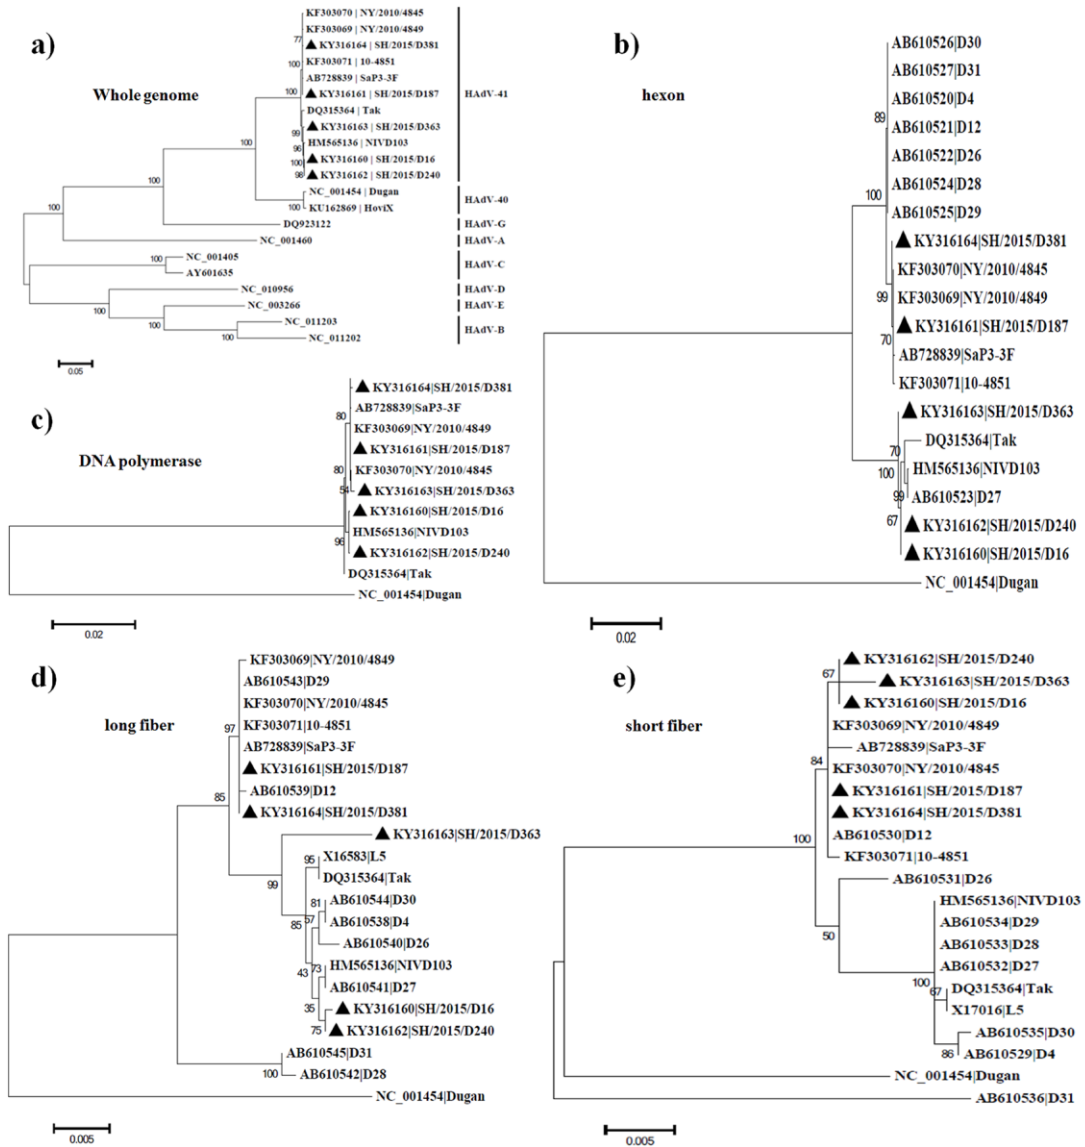

**Supplementary Figure S3.** The Bayesian-inferred tree based on the whole genome (a), hexon (b), DNA polymerase (c), long fiber (d) and short fiber (e). The Bayesian trees were inferred using GTR substitution model with gamma-distributed rate variation for 80,000 iterations using MrBayes.

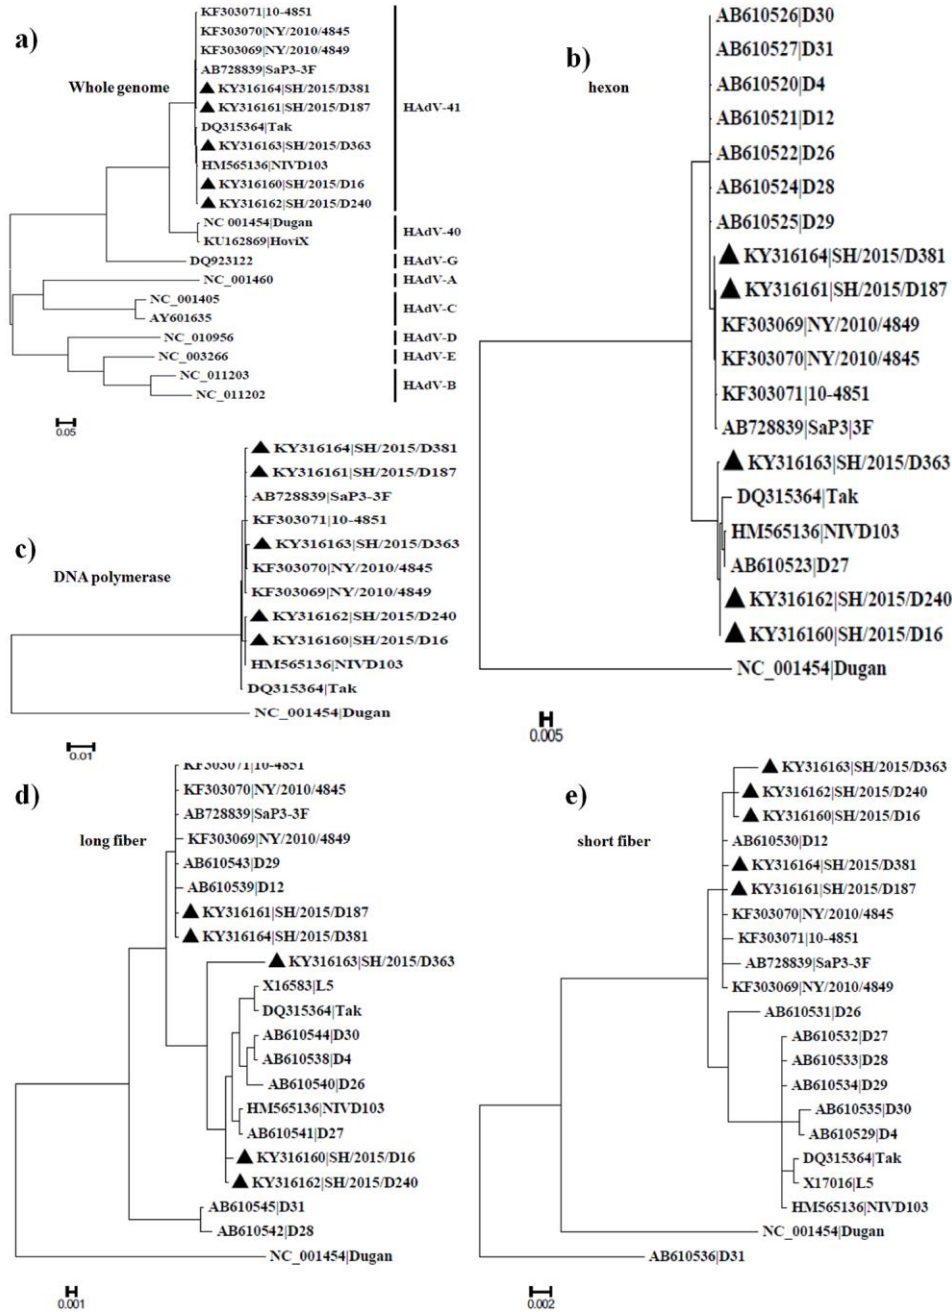

**Supplementary Figure S4.** Similarity plots of hexon, long fiber and whole genome sequences of the recombinant isolates. (a) hexon of SH/2015/D16; (b) genome of SH/2015/D16; (c) hexon of SH/2015/D240; (d) genome of SH/2015/D240; (e) hexon of SH/2015/D363; (f) genome of SH/2015/D363; (g) long fiber of SH/2015/D363; and (h) genome of SH/2015/D187.

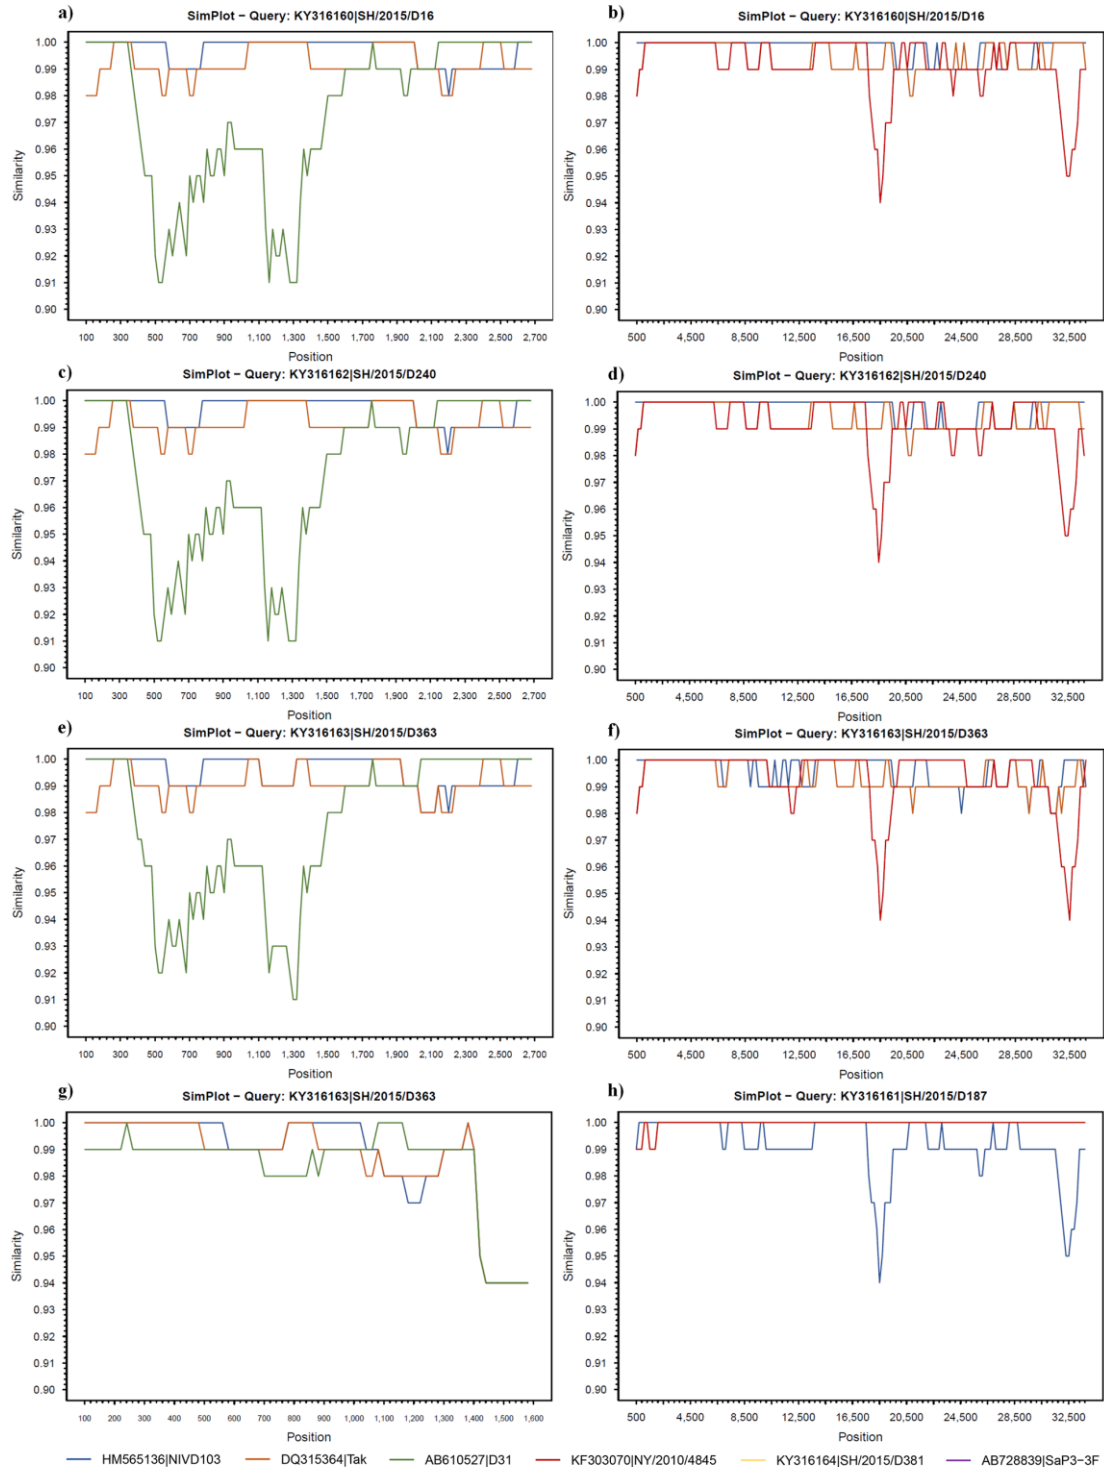

**Supplementary Table S1.** General features of sequenced reads of the samples

| <b>Sample</b> | <b>Acc. No.</b> | <b>No. of raw reads</b> | <b>No. of viral reads</b> | <b>Expected coverage</b> |
|---------------|-----------------|-------------------------|---------------------------|--------------------------|
| SH/2015/D16   | KY36160         | 61471                   | 31865                     | 178                      |
| SH/2015/D18   | KY36161         | 42861                   | 21551                     | 137                      |
| SH/2015/D240  | KY36162         | 59118                   | 22604                     | 143                      |
| SH/2015/D363  | KY36163         | 63040                   | 33114                     | 210                      |
| SH/2015/D381  | KY36164         | 68165                   | 36755                     | 300                      |

Supplementary Table S2 comparative genomic analysis of the five strains with the reference genome NIVD103

| Location | Region     | Gene    | Nucleotide Change |                 |               |                  |                |                |
|----------|------------|---------|-------------------|-----------------|---------------|------------------|----------------|----------------|
|          |            |         | NIVD10<br>3       | SH/2015<br>/D16 | SH/2<br>015/D | SH/201<br>5/D240 | SH/20<br>15/D3 | SH/20<br>15/D3 |
| 62       | Non-coding | -       | C                 | T               | C             | T                | T              | C              |
| 69       | Non-coding | -       | T                 | A               | T             | A                | A              | T              |
| 77       | Non-coding | -       | A                 | T               | A             | T                | T              | A              |
| 86       | Non-coding | -       | T                 | G               | T             | G                | G              | T              |
| 115      | Non-coding | -       | T                 | C               | T             | C                | C              | T              |
| 125      | Non-coding | -       | T                 | C               | T             | C                | C              | T              |
| 172      | Non-coding | -       | A                 | A               | A             | A                | A              | -              |
| 187      | Non-coding | -       | G                 | G               | G             | G                | G              | -              |
| 243      | Non-coding | -       | C                 | T               | T             | T                | T              | C              |
| 284      | Non-coding | -       | G                 | A               | A             | A                | A              | G              |
| 324      | Non-coding | -       | G                 | A               | G             | A                | A              | G              |
| 337      | Non-coding | -       | G                 | A               | G             | A                | A              | G              |
| 361      | Non-coding | -       | G                 | G               | G             | G                | G              | A              |
| 453      | Non-coding | -       | C                 | G               | G             | G                | G              | C              |
| 481      | Non-coding | -       | C                 | T               | T             | T                | T              | C              |
| 502      | CDS        | E1A     | G                 | A               | A             | A                | A              | G              |
| 517      | CDS        | E1A     | G                 | T               | T             | T                | T              | G              |
| 561      | CDS        | E1A     | C                 | C               | C             | C                | C              | T              |
| 571      | CDS        | E1A     | T                 | C               | C             | C                | C              | T              |
| 598      | CDS        | E1A     | G                 | A               | A             | A                | A              | G              |
| 635      | CDS        | E1A     | G                 | C               | C             | C                | C              | G              |
| 638      | CDS        | E1A     | T                 | T               | C             | T                | T              | T              |
| 818      | CDS        | E1A     | G                 | A               | G             | A                | A              | G              |
| 1079     | Non-coding | -       | G                 | -               | G             | -                | -              | G              |
| 1352     | Non-coding | -       | C                 | C               | C             | C                | G              | G              |
| 1554     | CDS        | E1B 19K | T                 | C               | C             | C                | C              | T              |
| 1608     | CDS        | E1B 19K | T                 | T               | A             | T                | T              | T              |
| 1761     | CDS        | E1B 19K | A                 | G               | G             | G                | G              | G              |
| 1788     | CDS        | E1B 19K | C                 | C               | T             | C                | C              | C              |
| 1894     | CDS        | E1B 19K | G                 | G               | A             | G                | G              | G              |
| 1895     | CDS        | E1B 19K | A                 | A               | G             | A                | A              | A              |
| 1900     | CDS        | E1B 19K | -                 | -               | -             | G                | -              | -              |
| 1900     | CDS        | E1B 19K | -                 | -               | -             | A                | -              | -              |

|      |     |         |   |   |   |   |   |   |
|------|-----|---------|---|---|---|---|---|---|
| 1900 | CDS | E1B 19K | - | - | - | G | - | - |
| 2058 | CDS | E1B 55K | C | C | C | G | C | C |
| 3487 | CDS | IX      | C | T | C | C | C | C |
| 3816 | CDS | IVa2    | C | T | C | T | C | C |
| 3843 | CDS | IVa2    | G | G | G | G | A | A |
| 4620 | CDS | IVa2    | G | G | T | G | G | G |
|      |     | E2B     |   |   |   |   |   |   |
| 5128 | CDS | DNA pol | G | G | G | G | G | T |
|      |     | E2B     |   |   |   |   |   |   |
| 6314 | CDS | DNA pol | G | G | A | G | A | A |
|      |     | E2B     |   |   |   |   |   |   |
| 6441 | CDS | DNA pol | C | T | T | T | T | T |
|      |     | E2B     |   |   |   |   |   |   |
| 6658 | CDS | DNA pol | C | C | C | C | T | C |
|      |     | E2B     |   |   |   |   |   |   |
| 6740 | CDS | DNA pol | A | A | G | A | G | G |
|      |     | E2B     |   |   |   |   |   |   |
| 6872 | CDS | DNA pol | G | G | G | G | G | A |
|      |     | E2B     |   |   |   |   |   |   |
| 6914 | CDS | DNA pol | C | T | C | T | T | C |
|      |     | E2B     |   |   |   |   |   |   |
| 6959 | CDS | DNA pol | C | C | T | C | T | T |
|      |     | E2B     |   |   |   |   |   |   |
| 7316 | CDS | DNA pol | C | T | C | T | C | C |
|      |     | E2B     |   |   |   |   |   |   |
| 7319 | CDS | DNA pol | C | C | T | C | T | T |
|      |     | E2B     |   |   |   |   |   |   |
| 7369 | CDS | DNA pol | C | C | C | C | T | C |
|      |     | E2B     |   |   |   |   |   |   |
| 7388 | CDS | DNA pol | G | G | G | A | G | G |
|      |     | E2B     |   |   |   |   |   |   |
| 7417 | CDS | DNA pol | T | G | T | T | T | T |



|       |            |                                   |   |   |   |   |   |   |
|-------|------------|-----------------------------------|---|---|---|---|---|---|
| 8195  | CDS        | E2B<br>DNA pol                    | A | G | A | G | G | A |
| 8797  | CDS        | E2B<br>pretermi<br>nal<br>protein | G | A | G | A | G | G |
| 8904  | CDS        | E2B<br>pretermi<br>nal<br>protein | G | A | G | A | A | G |
| 8938  | CDS        | E2B<br>pretermi<br>nal<br>protein | C | T | C | T | T | C |
| 9016  | CDS        | E2B<br>pretermi<br>nal<br>protein | G | A | G | A | G | G |
| 9125  | CDS        | E2B<br>pretermi<br>nal<br>protein | T | G | T | G | G | T |
| 9325  | CDS        | E2B<br>pretermi<br>nal<br>protein | A | G | G | G | G | G |
| 9367  | CDS        | E2B<br>pretermi<br>nal<br>protein | A | T | A | T | A | A |
| 9739  | CDS        | E2B<br>pretermi<br>nal<br>protein | G | A | G | A | G | G |
| 9898  | CDS        | protein                           | G | A | G | A | G | G |
| 10038 | Non-coding | -                                 | T | T | T | T | A | T |
| 10039 | Non-coding | -                                 | G | G | G | G | T | G |
| 10041 | Non-coding | -                                 | A | A | A | A | G | A |
| 10375 | CDS        | 52-55K                            | T | C | T | C | C | T |
| 10512 | CDS        | 52-55K                            | C | T | C | T | C | C |
| 10545 | CDS        | 52-55K                            | A | A | C | A | A | A |
| 10639 | CDS        | 52-55K                            | C | C | C | C | T | C |
| 10703 | CDS        | 52-55K                            | A | A | A | A | G | A |

|       |            |        |   |   |   |   |   |   |
|-------|------------|--------|---|---|---|---|---|---|
| 10821 | CDS        | 52-55K | G | A | G | A | A | G |
| 10827 | CDS        | 52-55K | A | G | A | G | G | A |
| 10908 | CDS        | 52-55K | G | A | G | A | A | G |
| 10966 | CDS        | 52-55K | T | C | T | C | C | T |
| 10972 | CDS        | 52-55K | C | T | C | T | T | C |
| 11088 | CDS        | 52-55K | T | C | T | C | C | T |
| 11242 | CDS        | 52-55K | G | A | G | A | G | G |
| 11301 | CDS        | 52-55K | G | A | G | A | G | G |
| 11340 | CDS        | 52-55K | C | T | C | T | C | C |
| 11365 | CDS        | 52-55K | G | A | G | - | G | G |
| 11366 | CDS        | 52-55K | A | G | A | - | A | A |
| 11367 | CDS        | 52-55K | G | G | G | - | G | G |
| 11690 | CDS        | IIIa   | A | G | A | G | G | A |
| 11744 | CDS        | IIIa   | C | T | C | T | T | C |
| 11750 | CDS        | IIIa   | C | T | C | T | T | C |
| 11804 | CDS        | IIIa   | G | G | G | G | A | G |
| 11906 | CDS        | IIIa   | A | G | A | G | G | A |
| 11930 | CDS        | IIIa   | C | T | C | T | T | C |
| 11984 | CDS        | IIIa   | C | C | A | C | C | A |
| 11996 | CDS        | IIIa   | C | T | C | T | T | C |
| 12020 | CDS        | IIIa   | A | G | A | G | G | A |
| 12144 | CDS        | IIIa   | C | T | C | T | T | C |
| 12155 | CDS        | IIIa   | C | T | C | T | T | C |
| 12185 | CDS        | IIIa   | G | C | G | C | C | G |
| 12239 | CDS        | IIIa   | A | C | A | C | C | A |
| 12308 | CDS        | IIIa   | G | T | G | T | T | G |
| 12338 | CDS        | IIIa   | C | T | C | T | T | C |
| 12697 | CDS        | IIIa   | T | C | T | C | T | T |
| 12703 | CDS        | IIIa   | C | T | C | T | C | C |
| 12805 | CDS        | IIIa   | G | C | G | C | G | G |
| 13071 | CDS        | IIIa   | C | C | T | C | T | T |
| 13118 | CDS        | IIIa   | A | G | A | G | A | A |
| 13156 | Non-coding | -      | A | T | A | T | A | A |
| 13159 | Non-coding | -      | T | A | A | A | A | A |
| 13163 | Non-coding | -      | A | - | A | - | A | A |
| 13164 | Non-coding | -      | A | - | A | - | A | A |
| 13165 | Non-coding | -      | A | - | A | - | A | A |
| 13166 | Non-coding | -      | A | - | A | - | A | A |
| 13167 | Non-coding | -      | A | - | A | - | A | A |
| 13168 | Non-coding | -      | A | - | A | - | A | A |
| 13169 | Non-coding | -      | A | - | A | - | A | A |
| 13170 | Non-coding | -      | A | - | A | - | A | A |
| 13171 | Non-coding | -      | A | - | A | - | A | A |
| 13172 | Non-coding | -      | A | - | - | - | A | A |
| 13220 | Non-coding | -      | - | C | C | C | - | C |

|       |            |        |   |   |   |   |   |   |
|-------|------------|--------|---|---|---|---|---|---|
| 13221 | Non-coding | -      | T | C | C | C | C | C |
|       |            | penton |   |   |   |   |   |   |
| 13693 | CDS        | base   | C | C | T | C | T | T |
|       |            | penton |   |   |   |   |   |   |
| 13699 | CDS        | base   | A | A | G | A | G | G |
|       |            | penton |   |   |   |   |   |   |
| 13952 | CDS        | base   | C | C | C | C | T | C |
|       |            | penton |   |   |   |   |   |   |
| 14003 | CDS        | base   | T | C | C | C | C | C |
|       |            | penton |   |   |   |   |   |   |
| 14755 | CDS        | base   | C | T | C | C | C | C |
| 14798 | CDS        | pVII   | C | T | T | T | T | T |
| 14926 | CDS        | pVII   | G | C | C | C | C | C |
| 15157 | CDS        | pVII   | G | A | G | G | G | G |
| 15245 | CDS        | pVII   | G | A | G | A | G | G |
| 15269 | CDS        | pVII   | A | G | G | G | G | G |
| 15526 | CDS        | V      | A | G | G | G | G | G |
| 15709 | CDS        | V      | C | C | C | C | T | C |
| 15734 | CDS        | V      | T | C | C | C | C | C |
| 15896 | CDS        | V      | T | C | C | C | C | C |
| 16034 | CDS        | V      | T | C | C | C | C | C |
| 16100 | CDS        | V      | T | G | G | G | G | G |
| 16101 | CDS        | V      | G | C | C | C | C | C |
| 16140 | CDS        | V      | C | A | A | A | A | A |
| 16177 | CDS        | V      | G | T | T | T | T | T |
| 16190 | CDS        | V      | A | G | A | G | G | A |
| 16337 | CDS        | V      | T | C | C | C | C | C |
| 16385 | CDS        | V      | T | C | C | C | C | C |
| 17035 | CDS        | VI     | T | T | C | T | C | C |
| 17161 | CDS        | VI     | C | T | C | T | C | C |
| 17176 | CDS        | VI     | T | C | C | C | C | C |
| 17260 | CDS        | VI     | C | C | C | C | C | T |
| 17305 | CDS        | VI     | G | A | G | A | G | G |
| 17347 | CDS        | VI     | A | G | G | G | G | G |
| 17348 | CDS        | VI     | A | G | G | G | G | G |
| 17398 | CDS        | VI     | C | C | T | C | T | T |
| 17528 | Non-coding | -      | A | G | G | G | G | G |
| 17672 | CDS        | hexon  | C | T | T | T | T | T |
| 17687 | CDS        | hexon  | A | G | G | G | G | G |
| 17738 | CDS        | hexon  | T | C | C | C | C | C |
| 18032 | CDS        | hexon  | G | G | A | G | G | A |
| 18038 | CDS        | hexon  | T | T | A | T | T | A |
| 18042 | CDS        | hexon  | T | T | C | T | T | C |
| 18060 | CDS        | hexon  | A | G | G | G | G | G |
| 18062 | CDS        | hexon  | T | T | C | T | T | C |
| 18071 | CDS        | hexon  | T | G | T | G | G | T |

|       |     |       |   |   |   |   |   |   |
|-------|-----|-------|---|---|---|---|---|---|
| 18092 | CDS | hexon | T | T | C | T | T | C |
| 18093 | CDS | hexon | A | A | G | A | A | G |
| 18098 | CDS | hexon | A | A | G | A | A | G |
| 18101 | CDS | hexon | T | T | - | T | - | - |
| 18102 | CDS | hexon | C | C | - | C | - | - |
| 18103 | CDS | hexon | A | A | - | A | - | - |
| 18125 | CDS | hexon | C | C | A | C | C | A |
| 18149 | CDS | hexon | T | T | C | T | T | C |
| 18176 | CDS | hexon | C | C | T | C | C | T |
| 18180 | CDS | hexon | G | G | A | G | G | A |
| 18183 | CDS | hexon | C | C | G | C | C | G |
| 18185 | CDS | hexon | A | A | C | A | A | C |
| 18203 | CDS | hexon | G | G | A | G | G | A |
| 18204 | CDS | hexon | C | C | T | C | C | T |
| 18230 | CDS | hexon | A | G | A | G | G | A |
| 18269 | CDS | hexon | C | T | T | T | T | T |
| 18278 | CDS | hexon | T | T | C | T | T | C |
| 18280 | CDS | hexon | G | G | A | G | G | A |
| 18284 | CDS | hexon | C | C | T | C | C | T |
| 18290 | CDS | hexon | G | G | A | G | G | A |
| 18345 | CDS | hexon | C | C | G | C | C | G |
| 18349 | CDS | hexon | G | G | A | G | G | A |
| 18361 | CDS | hexon | A | A | T | A | A | T |
| 18386 | CDS | hexon | A | G | G | G | G | G |
| 18389 | CDS | hexon | C | C | T | C | C | T |
| 18393 | CDS | hexon | T | T | G | T | T | G |
| 18395 | CDS | hexon | C | C | T | C | C | T |
| 18450 | CDS | hexon | A | A | G | A | A | G |
| 18476 | CDS | hexon | G | G | A | G | G | A |
| 18497 | CDS | hexon | G | G | A | G | G | A |
| 18524 | CDS | hexon | T | C | C | C | C | C |
| 18527 | CDS | hexon | C | C | T | C | C | T |
| 18563 | CDS | hexon | T | T | C | T | T | C |
| 18578 | CDS | hexon | A | A | G | A | A | G |
| 18632 | CDS | hexon | A | A | G | A | A | G |
| 18650 | CDS | hexon | C | C | T | C | C | T |
| 18653 | CDS | hexon | A | A | T | A | A | T |
| 18680 | CDS | hexon | T | T | C | T | T | C |
| 18722 | CDS | hexon | G | G | A | G | G | A |
| 18753 | CDS | hexon | C | C | T | C | C | T |
| 18803 | CDS | hexon | C | C | T | C | T | T |
| 18815 | CDS | hexon | G | G | A | G | G | G |
| 18818 | CDS | hexon | C | C | A | C | C | A |
| 18821 | CDS | hexon | T | T | C | T | T | C |
| 18822 | CDS | hexon | G | G | A | G | G | A |

|       |     |          |   |   |   |   |   |   |
|-------|-----|----------|---|---|---|---|---|---|
| 18825 | CDS | hexon    | C | C | G | C | C | G |
| 18826 | CDS | hexon    | A | A | G | A | A | G |
| 18829 | CDS | hexon    | C | C | A | C | C | A |
| 18839 | CDS | hexon    | A | A | G | A | A | G |
| 18843 | CDS | hexon    | G | G | A | G | G | A |
| 18846 | CDS | hexon    | A | A | G | A | A | G |
| 18848 | CDS | hexon    | - | - | C | - | C | C |
| 18848 | CDS | hexon    | - | - | A | - | A | A |
| 18848 | CDS | hexon    | - | - | C | - | C | C |
| 18875 | CDS | hexon    | A | A | G | A | A | G |
| 18884 | CDS | hexon    | C | C | T | C | C | T |
| 18938 | CDS | hexon    | C | C | T | C | C | T |
| 18950 | CDS | hexon    | T | T | C | T | T | C |
| 18951 | CDS | hexon    | T | T | C | T | T | C |
| 18956 | CDS | hexon    | C | C | T | C | C | T |
| 18974 | CDS | hexon    | G | G | A | G | G | A |
| 18998 | CDS | hexon    | G | G | A | G | G | A |
| 19058 | CDS | hexon    | C | C | T | C | C | T |
| 19076 | CDS | hexon    | C | T | C | T | T | C |
| 19154 | CDS | hexon    | A | A | G | A | A | G |
| 19238 | CDS | hexon    | C | G | G | G | G | G |
| 19244 | CDS | hexon    | G | G | T | G | G | T |
| 19457 | CDS | hexon    | C | C | T | C | C | T |
| 19508 | CDS | hexon    | A | A | C | A | A | C |
| 19613 | CDS | hexon    | C | C | T | C | T | T |
| 19691 | CDS | hexon    | T | C | C | C | C | C |
| 19706 | CDS | hexon    | T | C | C | C | C | C |
| 19835 | CDS | hexon    | T | C | C | C | C | C |
| 19874 | CDS | hexon    | C | T | C | T | T | C |
| 20072 | CDS | hexon    | T | T | C | T | T | C |
| 20198 | CDS | hexon    | C | T | T | T | T | T |
| 20412 | CDS | protease | T | C | C | C | C | C |
| 20421 | CDS | protease | C | T | T | T | T | T |
| 20434 | CDS | protease | C | T | T | T | T | T |
| 20441 | CDS | protease | T | C | C | C | C | C |
| 20467 | CDS | protease | G | A | A | A | A | A |
| 20572 | CDS | protease | C | G | C | G | G | C |
| 20614 | CDS | protease | A | G | G | G | G | G |
| 20680 | CDS | protease | C | C | T | C | C | T |
| 20716 | CDS | protease | C | T | T | T | T | T |
| 20734 | CDS | protease | G | A | A | A | A | A |
| 20848 | CDS | protease | G | A | T | A | A | T |
| 20875 | CDS | protease | T | C | C | C | C | C |
| 20878 | CDS | protease | A | G | A | G | A | A |
| 20918 | CDS | protease | C | T | T | T | T | T |

|       |            |            |   |   |   |   |   |   |
|-------|------------|------------|---|---|---|---|---|---|
| 21059 | Non-coding | -          | - | T | T | T | - | - |
| 21059 | Non-coding | -          | - | T | - | T | - | - |
| 21059 | Non-coding | -          | - | T | - | T | - | - |
| 21059 | Non-coding | -          | - | T | - | T | - | - |
| 21075 | CDS        | E2A<br>DBP | C | T | T | T | T | T |
| 21223 | CDS        | E2A<br>DBP | A | G | G | G | G | G |
| 21286 | CDS        | E2A<br>DBP | G | G | G | G | A | G |
| 21359 | CDS        | E2A<br>DBP | C | T | T | T | T | T |
| 21439 | CDS        | E2A<br>DBP | T | C | C | C | C | C |
| 21471 | CDS        | E2A<br>DBP | C | T | T | T | T | T |
| 21718 | CDS        | E2A<br>DBP | G | A | G | A | A | G |
| 21880 | CDS        | E2A<br>DBP | G | A | G | A | A | G |
| 21958 | CDS        | E2A<br>DBP | C | T | T | T | T | T |
| 22051 | CDS        | E2A<br>DBP | T | C | C | C | C | C |
| 22166 | CDS        | E2A<br>DBP | C | T | C | T | C | C |
| 22195 | CDS        | E2A<br>DBP | T | C | T | C | T | T |
| 22350 | CDS        | E2A<br>DBP | C | C | T | C | T | T |
| 22378 | CDS        | E2A<br>DBP | - | - | C | - | - | - |
| 22378 | CDS        | E2A<br>DBP | - | - | T | - | - | - |
| 22378 | CDS        | E2A<br>DBP | - | - | C | - | - | - |
| 22378 | CDS        | E2A<br>DBP | - | - | C | - | - | - |
| 22378 | CDS        | E2A<br>DBP | - | - | G | - | - | - |
| 22378 | CDS        | E2A<br>DBP | - | - | G | - | - | - |
| 22378 | CDS        | E2A<br>DBP | - | - | T | - | - | - |
| 22378 | CDS        | E2A<br>DBP | - | - | A | - | - | - |

|       |     |            |   |   |   |   |   |   |
|-------|-----|------------|---|---|---|---|---|---|
| 22378 | CDS | E2A<br>DBP | - | - | C | - | - | - |
| 22378 | CDS | E2A<br>DBP | - | - | T | - | - | - |
| 22378 | CDS | E2A<br>DBP | - | - | T | - | - | - |
| 22378 | CDS | E2A<br>DBP | - | - | G | - | - | - |
| 22396 | CDS | E2A<br>DBP | C | C | T | C | T | T |
| 22413 | CDS | E2A<br>DBP | G | G | A | G | A | A |
| 22454 | CDS | E2A<br>DBP | A | C | A | A | A | A |
| 22455 | CDS | DBP        | C | G | C | C | C | C |
| 22584 | CDS | 100K       | T | C | C | C | C | C |
| 22830 | CDS | 100K       | T | C | C | C | C | C |
| 22941 | CDS | 100K       | C | T | T | T | T | T |
| 23103 | CDS | 100K       | A | G | A | G | A | A |
| 23116 | CDS | 100K       | C | C | C | C | A | C |
| 23117 | CDS | 100K       | A | A | A | A | C | A |
| 23253 | CDS | 100K       | T | A | T | T | T | T |
| 23328 | CDS | 100K       | T | C | C | C | C | C |
| 23358 | CDS | 100K       | T | C | C | C | C | C |
| 23375 | CDS | 100K       | G | C | C | C | C | C |
| 23428 | CDS | 100K       | T | C | C | C | C | C |
| 23431 | CDS | 100K       | G | A | A | A | A | A |
| 23553 | CDS | 100K       | C | C | T | C | C | T |
| 23625 | CDS | 100K       | T | C | C | C | C | C |
| 23643 | CDS | 100K       | T | T | T | C | T | T |
| 23772 | CDS | 100K       | C | C | T | C | C | T |
| 23865 | CDS | 100K       | A | A | G | A | G | G |
| 23883 | CDS | 100K       | A | A | A | A | G | A |
| 23916 | CDS | 100K       | C | C | T | C | T | T |
| 23982 | CDS | 100K       | C | T | C | C | C | C |
| 23991 | CDS | 100K       | T | C | T | C | T | T |
| 23997 | CDS | 100K       | C | T | C | T | C | C |
| 24033 | CDS | 100K       | C | C | T | C | T | T |
| 24148 | CDS | 100K       | T | T | C | T | C | C |
| 24173 | CDS | 100K       | G | G | A | G | A | A |
| 24186 | CDS | 100K       | G | G | A | G | A | A |
| 24218 | CDS | 100K       | G | G | A | G | A | A |
| 24294 | CDS | 100K       | G | G | G | A | G | G |
| 24360 | CDS | 100K       | A | A | G | A | G | G |
| 24363 | CDS | 100K       | C | C | T | C | T | T |

|       |            |             |   |   |   |   |   |   |
|-------|------------|-------------|---|---|---|---|---|---|
| 24745 | CDS        | 100K        | C | T | T | T | T | T |
| 24751 | CDS        | 100K        | A | G | G | G | G | G |
| 24812 | CDS        | 100K        | C | T | C | T | T | C |
| 24898 | Non-coding | -           | C | C | - | - | G | - |
| 24899 | Non-coding | -           | A | A | - | - | C | - |
| 24900 | Non-coding | -           | C | C | - | - | C | - |
| 24911 | Non-coding | -           | - | - | - | - | G | - |
| 24947 | Non-coding | -           | - | - | - | - | T | - |
| 24949 | Non-coding | -           | T | C | C | C | C | C |
| 25133 | Non-coding | -           | T | T | C | T | T | C |
| 25218 | Non-coding | -           | C | T | T | T | T | T |
| 25289 | Non-coding | -           | C | T | C | T | T | C |
| 25339 | Non-coding | -           | G | G | A | G | G | A |
| 25350 | Non-coding | -           | C | C | T | C | C | T |
| 25379 | Non-coding | -           | - | T | - | - | - | - |
| 25381 | Non-coding | -           | G | G | G | A | G | G |
| 25391 | Non-coding | -           | G | A | A | A | A | A |
| 25584 | CDS        | pVIII       | G | A | G | A | A | G |
| 25626 | CDS        | pVIII       | C | T | C | T | C | C |
| 25631 | CDS        | pVIII       | T | C | C | C | C | C |
| 25701 | CDS        | pVIII       | A | A | G | A | G | G |
| 25800 | CDS        | pVIII       | T | C | T | C | T | T |
| 25849 | CDS        | pVIII       | A | A | G | A | G | G |
| 25854 | CDS        | pVIII       | T | T | C | T | C | C |
| 26155 | Non-coding | -           | G | G | T | G | G | T |
| 26195 | Non-coding | -           | C | C | T | C | C | T |
| 26201 | Non-coding | -           | G | A | G | A | A | G |
| 26203 | Non-coding | -           | T | T | C | T | T | C |
| 26269 | CDS        | E3<br>19.4K | G | G | A | G | G | A |
| 26283 | CDS        | E3<br>19.4K | A | A | G | A | A | G |
| 26294 | CDS        | E3<br>19.4K | C | C | T | C | C | T |
| 26306 | CDS        | E3<br>19.4K | A | A | G | A | A | G |
| 26317 | CDS        | E3<br>19.4K | C | C | A | C | C | A |
| 26528 | CDS        | E3<br>19.4K | A | A | A | A | G | A |
| 26649 | CDS        | E3<br>19.4K | A | G | A | G | A | A |
| 26830 | CDS        | E3<br>31.6K | T | C | C | C | C | C |
| 26953 | CDS        | E3<br>31.6K | T | C | T | C | C | T |



|       |     |                           |   |   |   |   |   |   |
|-------|-----|---------------------------|---|---|---|---|---|---|
| 27350 | CDS | E3<br>31.6K               | G | G | A | G | G | A |
| 27435 | CDS | E3<br>31.6K               | A | G | A | G | G | A |
| 27450 | CDS | E3<br>31.6K               | T | T | T | T | C | T |
| 27451 | CDS | E3<br>31.6K               | C | C | C | C | T | C |
| 27533 | CDS | E3<br>31.6K               | G | A | G | A | A | G |
| 27751 | CDS | E3<br>10.1K               | T | T | T | C | T | T |
| 27829 | CDS | E3<br>10.1K               | G | A | G | A | A | G |
| 27876 | CDS | E3<br>14.5K               | T | C | T | C | C | T |
| 27887 | CDS | E3<br>14.5K               | T | T | T | C | T | T |
| 28134 | CDS | E3<br>14.5K               | G | G | G | A | G | G |
| 28225 | CDS | E3<br>14.7K               | C | T | C | T | C | C |
| 29081 | CDS | short<br>fiber<br>protein | C | C | C | C | A | C |
| 29092 | CDS | short<br>fiber<br>protein | A | T | A | T | T | A |
| 29128 | CDS | short<br>fiber<br>protein | T | C | C | C | C | C |
| 29150 | CDS | short<br>fiber<br>protein | T | G | G | G | G | G |
| 29153 | CDS | short<br>fiber<br>protein | A | G | G | G | G | G |
| 29155 | CDS | short<br>fiber<br>protein | A | G | G | G | G | G |
| 29179 | CDS | short<br>fiber<br>protein | T | C | C | C | C | C |
| 29276 | CDS | short<br>fiber<br>protein | A | G | G | G | G | G |

|       |     |                           |   |   |   |   |   |   |
|-------|-----|---------------------------|---|---|---|---|---|---|
| 29284 | CDS | short<br>fiber<br>protein | G | A | A | A | A | A |
| 29591 | CDS | short<br>fiber<br>protein | T | C | C | C | C | C |
| 29669 | CDS | short<br>fiber<br>protein | A | G | G | G | G | G |
| 29738 | CDS | short<br>fiber<br>protein | C | G | G | G | G | G |
| 29743 | CDS | short<br>fiber<br>protein | G | A | A | A | A | A |
| 29773 | CDS | short<br>fiber<br>protein | C | C | C | C | A | C |
| 29774 | CDS | short<br>fiber<br>protein | A | A | A | A | C | A |
| 29866 | CDS | short<br>fiber<br>protein | T | C | C | C | C | C |
| 30062 | CDS | long<br>fiber<br>protein  | A | A | T | A | A | T |
| 30287 | CDS | long<br>fiber<br>protein  | A | A | T | A | A | T |
| 30318 | CDS | long<br>fiber<br>protein  | T | T | C | T | T | C |
| 30488 | CDS | long<br>fiber<br>protein  | T | T | C | T | T | C |
| 30535 | CDS | long<br>fiber<br>protein  | G | A | A | A | A | A |
| 30608 | CDS | long<br>fiber<br>protein  | G | A | A | A | A | A |
| 30656 | CDS | long<br>fiber<br>protein  | T | T | C | T | T | C |

|       |     |                          |   |   |   |   |   |   |
|-------|-----|--------------------------|---|---|---|---|---|---|
| 30687 | CDS | long<br>fiber<br>protein | G | G | T | G | G | T |
| 30728 | CDS | long<br>fiber<br>protein | C | C | T | C | C | T |
| 30857 | CDS | long<br>fiber<br>protein | T | T | C | T | T | C |
| 30917 | CDS | long<br>fiber<br>protein | C | T | C | T | T | C |
| 30932 | CDS | long<br>fiber<br>protein | A | G | G | G | G | G |
| 31073 | CDS | long<br>fiber<br>protein | C | C | T | C | T | T |
| 31118 | CDS | long<br>fiber<br>protein | C | T | C | T | C | C |
| 31121 | CDS | long<br>fiber<br>protein | A | A | G | A | G | G |
| 31124 | CDS | long<br>fiber<br>protein | A | A | T | A | T | T |
| 31207 | CDS | long<br>fiber<br>protein | T | T | T | T | G | T |
| 31262 | CDS | long<br>fiber<br>protein | C | G | C | C | C | C |
| 31286 | CDS | long<br>fiber<br>protein | T | T | C | T | T | C |
| 31439 | CDS | long<br>fiber<br>protein | A | A | A | A | G | A |
| 31441 | CDS | long<br>fiber<br>protein | G | G | G | G | T | G |
| 31443 | CDS | long<br>fiber<br>protein | T | T | T | T | C | T |

|       |            |                                     |   |   |   |   |   |   |
|-------|------------|-------------------------------------|---|---|---|---|---|---|
| 31444 | CDS        | long<br>fiber<br>protein            | C | C | C | C | A | C |
| 31451 | CDS        | long<br>fiber<br>protein            | T | T | T | T | C | T |
| 31452 | CDS        | long<br>fiber<br>protein            | C | C | C | C | A | C |
| 31453 | CDS        | long<br>fiber<br>protein            | A | A | A | A | G | A |
| 31454 | CDS        | long<br>fiber<br>protein            | G | G | G | G | A | G |
| 31456 | CDS        | long<br>fiber<br>protein            | A | A | A | A | T | A |
| 31462 | CDS        | long<br>fiber<br>protein            | C | C | C | C | T | C |
| 31463 | CDS        | long<br>fiber<br>protein            | T | T | T | T | C | T |
| 31700 | Non-coding | -                                   | C | C | C | C | A | C |
| 31782 | Non-coding | -                                   | T | C | C | C | C | C |
| 31893 | Non-coding | -                                   | T | T | C | T | T | C |
| 31927 | CDS        | E4<br>hypothet<br>ical<br>protein 6 | C | C | T | C | C | T |
| 31934 | CDS        | E4<br>hypothet<br>ical<br>protein 6 | T | T | C | T | T | C |
| 31969 | CDS        | E4<br>hypothet<br>ical<br>protein 6 | C | C | T | C | C | T |
| 31975 | CDS        | E4<br>hypothet<br>ical<br>protein 6 | C | C | T | C | C | T |

|       |     |                                     |   |   |   |   |   |   |
|-------|-----|-------------------------------------|---|---|---|---|---|---|
| 31986 | CDS | E4<br>hypothet<br>ical<br>protein 6 | A | A | G | A | A | G |
| 31991 | CDS | E4<br>hypothet<br>ical<br>protein 6 | T | T | C | T | T | C |
| 32017 | CDS | E4<br>hypothet<br>ical<br>protein 6 | C | C | T | C | C | T |
| 32018 | CDS | E4<br>hypothet<br>ical<br>protein 6 | C | C | T | C | C | T |
| 32042 | CDS | E4<br>hypothet<br>ical<br>protein 6 | T | T | C | T | T | C |
| 32050 | CDS | E4<br>hypothet<br>ical<br>protein 6 | C | C | A | C | C | A |
| 32068 | CDS | E4<br>hypothet<br>ical<br>protein 6 | T | T | G | T | T | G |
| 32073 | CDS | E4<br>hypothet<br>ical<br>protein 6 | G | G | A | G | G | A |
| 32080 | CDS | E4<br>hypothet<br>ical<br>protein 6 | T | T | C | T | T | C |

|       |     |                                     |   |   |   |   |   |   |
|-------|-----|-------------------------------------|---|---|---|---|---|---|
| 32092 | CDS | E4<br>hypothet<br>ical<br>protein 6 | G | G | A | G | G | A |
| 32098 | CDS | E4<br>hypothet<br>ical<br>protein 6 | A | A | T | A | A | T |
| 32137 | CDS | E4<br>hypothet<br>ical<br>protein 6 | A | A | G | A | A | G |
| 32161 | CDS | E4<br>hypothet<br>ical<br>protein 6 | A | A | G | A | A | G |
| 32185 | CDS | E4<br>hypothet<br>ical<br>protein 6 | C | T | C | T | T | C |
| 32218 | CDS | E4<br>hypothet<br>ical<br>protein 6 | G | G | A | G | G | A |
| 32235 | CDS | E4<br>hypothet<br>ical<br>protein 6 | G | G | A | G | G | A |
| 32245 | CDS | E4<br>hypothet<br>ical<br>protein 6 | T | T | C | T | T | C |
| 32250 | CDS | E4<br>hypothet<br>ical<br>protein 6 | A | A | T | A | A | T |

|       |     |                                     |   |   |   |   |   |   |
|-------|-----|-------------------------------------|---|---|---|---|---|---|
| 32254 | CDS | E4<br>hypothet<br>ical<br>protein 6 | C | C | T | C | C | T |
| 32263 | CDS | E4<br>hypothet<br>ical<br>protein 6 | A | G | G | G | G | G |
| 32347 | CDS | E4<br>hypothet<br>ical<br>protein 6 | T | T | C | T | T | C |
| 32349 | CDS | E4<br>hypothet<br>ical<br>protein 6 | A | A | G | A | A | G |
| 32377 | CDS | E4<br>hypothet<br>ical<br>protein 6 | A | A | G | A | A | G |
| 32379 | CDS | E4<br>hypothet<br>ical<br>protein 6 | G | G | T | G | G | T |
| 32398 | CDS | E4<br>hypothet<br>ical<br>protein 6 | T | T | C | T | T | C |
| 32469 | CDS | E4<br>hypothet<br>ical<br>protein 6 | T | T | T | T | C | T |
| 32490 | CDS | E4<br>hypothet<br>ical<br>protein 6 | T | T | G | T | T | G |

|       |     |                                     |   |   |   |   |   |   |
|-------|-----|-------------------------------------|---|---|---|---|---|---|
| 32500 | CDS | E4<br>hypothet<br>ical<br>protein 6 | G | G | A | G | G | A |
| 32525 | CDS | E4<br>hypothet<br>ical<br>protein 6 | T | T | C | T | T | C |
| 32527 | CDS | E4<br>hypothet<br>ical<br>protein 6 | G | G | A | G | G | A |
| 32547 | CDS | E4<br>hypothet<br>ical<br>protein 6 | C | C | T | C | C | T |
| 32553 | CDS | E4<br>hypothet<br>ical<br>protein 6 | A | A | G | A | A | G |
| 32556 | CDS | E4<br>hypothet<br>ical<br>protein 6 | C | C | T | C | C | T |
| 32578 | CDS | E4<br>hypothet<br>ical<br>protein 6 | C | C | T | C | C | T |
| 32592 | CDS | E4<br>hypothet<br>ical<br>protein 6 | C | C | T | C | C | T |
| 32596 | CDS | E4<br>hypothet<br>ical<br>protein 6 | A | A | G | A | A | G |



|       |     |                                     |   |   |   |   |   |   |
|-------|-----|-------------------------------------|---|---|---|---|---|---|
| 32599 | CDS | E4<br>hypothet<br>ical<br>protein 6 | T | T | A | T | T | A |
| 32615 | CDS | E4<br>hypothet<br>ical<br>protein 6 | C | C | G | C | C | G |
| 32626 | CDS | E4<br>hypothet<br>ical<br>protein 6 | A | A | G | A | A | G |
| 32675 | CDS | E4<br>hypothet<br>ical<br>protein 6 | T | T | C | T | T | C |
| 32686 | CDS | E4<br>hypothet<br>ical<br>protein 6 | A | A | G | A | A | G |
| 32692 | CDS | E4<br>hypothet<br>ical<br>protein 6 | A | A | G | A | A | G |
| 32723 | CDS | E4<br>hypothet<br>ical<br>protein 6 | T | T | C | T | T | C |
| 32730 | CDS | E4<br>hypothet<br>ical<br>protein 6 | C | C | T | C | C | T |
| 32750 | CDS | E4<br>hypothet<br>ical<br>protein 6 | C | C | T | C | C | T |

|       |     |                                     |   |   |   |   |   |   |
|-------|-----|-------------------------------------|---|---|---|---|---|---|
| 32752 | CDS | E4<br>hypothet<br>ical<br>protein 6 | G | A | G | A | A | G |
| 32783 | CDS | E4<br>hypothet<br>ical<br>protein 4 | C | C | T | C | C | T |
| 32791 | CDS | E4<br>hypothet<br>ical<br>protein 4 | T | T | C | T | T | C |
| 32810 | CDS | E4<br>hypothet<br>ical<br>protein 4 | T | T | C | T | G | C |
| 32856 | CDS | E4<br>hypothet<br>ical<br>protein 4 | T | C | C | C | C | C |
| 32867 | CDS | E4<br>hypothet<br>ical<br>protein 4 | T | T | G | T | T | G |
| 32892 | CDS | E4<br>hypothet<br>ical<br>protein 4 | A | A | G | A | A | G |
| 32897 | CDS | E4<br>hypothet<br>ical<br>protein 4 | T | T | C | T | T | C |
| 32953 | CDS | E4<br>hypothet<br>ical<br>protein 4 | T | T | C | T | T | C |

|       |     |                                     |   |   |   |   |   |   |
|-------|-----|-------------------------------------|---|---|---|---|---|---|
| 32957 | CDS | E4<br>hypothet<br>ical<br>protein 4 | T | T | C | T | T | C |
| 33017 | CDS | E4<br>hypothet<br>ical<br>protein 4 | G | G | A | G | G | A |
| 33059 | CDS | E4<br>hypothet<br>ical<br>protein 4 | T | T | C | T | T | C |
| 33172 | CDS | E4<br>hypothet<br>ical<br>protein 3 | A | A | G | A | A | G |
| 33216 | CDS | E4<br>hypothet<br>ical<br>protein 3 | A | A | G | A | A | G |
| 33361 | CDS | E4<br>hypothet<br>ical<br>protein 3 | A | G | G | G | G | G |
| 33588 | CDS | E4<br>hypothet<br>ical<br>protein 2 | T | C | C | C | C | C |
| 33636 | CDS | E4<br>hypothet<br>ical<br>protein 2 | G | G | A | G | G | A |
| 33803 | CDS | E4<br>hypothet<br>ical<br>protein 2 | A | A | A | C | A | A |

|       |            | E4<br>hypothetical<br>protein 2 |   |   |   |   |   |   |
|-------|------------|---------------------------------|---|---|---|---|---|---|
| 33804 | CDS        |                                 | T | C | C | A | C | C |
| 33842 | Non-coding | -                               | G | C | G | C | G | G |
| 33931 | Non-coding | -                               | G | G | A | G | A | A |
| 33934 | Non-coding | -                               | A | A | G | A | G | G |
| 34007 | Non-coding | -                               | G | - | G | - | - | G |
| 34008 | Non-coding | -                               | C | - | C | - | - | C |
| 34009 | Non-coding | -                               | A | - | A | - | - | A |
| 34010 | Non-coding | -                               | A | - | A | - | - | A |
| 34011 | Non-coding | -                               | A | - | A | - | - | A |
| 34012 | Non-coding | -                               | A | - | A | - | - | A |
| 34013 | Non-coding | -                               | A | - | A | - | - | A |
| 34014 | Non-coding | -                               | A | - | A | - | - | A |
| 34015 | Non-coding | -                               | C | - | C | - | - | C |
| 34016 | Non-coding | -                               | A | - | A | - | - | A |
| 34017 | Non-coding | -                               | C | - | C | - | - | C |
| 34018 | Non-coding | -                               | C | - | C | - | - | C |
| 34019 | Non-coding | -                               | G | - | G | - | - | G |
| 34020 | Non-coding | -                               | C | - | C | - | - | C |
| 34032 | Non-coding | -                               | T | T | A | T | G | G |
| 34064 | Non-coding | -                               | A | G | A | G | A | A |
| 34074 | Non-coding | -                               | A | G | A | G | A | A |
| 34103 | Non-coding | -                               | A | C | A | C | A | A |
| 34112 | Non-coding | -                               | T | A | T | A | T | T |
| 34120 | Non-coding | -                               | A | T | A | T | A | A |
| 34127 | Non-coding | -                               | G | A | G | A | G | G |

"-" means not applicable
